# Supplementary material
Source: PubMed Central journal article supplement (PMC3523752)
Supplement: NIHMS413679-supplement-1_si_001.pdf [file NIHMS413679-supplement-1_si_001.pdf]

# SUPPORTING INFORMATION

## Protein Flexibility in Virtual Screening: The BACE-1 Case Study.

*Sandro Cosconati,<sup>a</sup> Luciana Marinelli,<sup>b</sup> Francesco Saverio Di Leva,<sup>c</sup> Valeria La Pietra,<sup>c</sup> Angela De Simone,<sup>d</sup> Francesca Mancini,<sup>d</sup> Vincenza Andrisano,<sup>d</sup> Ettore Novellino,<sup>b</sup> David S. Goodsell<sup>e</sup> and Arthur J. Olson<sup>e\*</sup>*

<sup>a</sup> Dipartimento Scienze e Tecnologie Ambientali, Biologiche e Farmaceutiche, Seconda Università di Napoli, Via Vivaldi 43, 81100 Caserta, Italy; <sup>b</sup>Dipartimento di Chimica Farmaceutica e Tossicologica, Università di Napoli "Federico II", Via D. Montesano, 49, 80131 Napoli; <sup>c</sup>Department of Drug Discovery and Development, Istituto Italiano di Tecnologia (IIT), Via Morego 30, 16163 Genova, Italy; <sup>d</sup>Dipartimento di Scienze Farmaceutiche, Via Belmeloro 6, University of Bologna, 40126 Bologna, Italy; <sup>e</sup>Department of Molecular Biology, The Scripps Research Institute, 10550 North Torrey Pines Road, La Jolla, California 92037.

**Table S1.** Root-mean square deviations (RMSD) of all the considered BACE-1 structures superimposed on the structure with PDB code 1XS7.<sup>1</sup>

| PDB  | RMSD (C $\alpha$ ) |
|------|--------------------|------|--------------------|------|--------------------|------|--------------------|------|--------------------|
| 1FKN | 0.685              | 2PH8 | 2.104              | 2ZHS | 2.047              | 3IVI | 1.862              | 3L5B | 2.441              |
| 1M4H | 0.691              | 2Q11 | 0.828              | 2ZHT | 2.036              | 3IXJ | 1.267              | 3L5C | 2.419              |
| 1SGZ | 0.465              | 2Q15 | 1.534              | 2ZHU | 2.031              | 3IXK | 1.278              | 3L5D | 2.309              |
| 1TQF | 1.868              | 2QK5 | 2.766              | 2ZHV | 2.077              | 3K5C | 1.380              | 3L5E | 2.615              |
| 1W50 | 1.690              | 2QMD | 2.612              | 2ZJH | 2.632              | 3K5D | 1.633              | 3L5F | 2.609              |
| 1W51 | 1.885              | 2QMF | 2.619              | 2ZJI | 2.229              | 3K5F | 1.752              | 3LHG | 1.163              |
| 1XN2 | 0.370              | 2QMG | 2.594              | 2ZJJ | 2.168              | 3K5G | 1.410              | 3LNK | 2.620              |
| 1XN3 | 0.462              | 2QP8 | 2.617              | 2ZJK | 2.105              | 3KMX | 2.798              | 3LPI | 2.601              |
| 1YM2 | 1.373              | 2QU2 | 1.412              | 2ZJL | 2.477              | 3KMY | 2.730              | 3LPJ | 2.620              |
| 1YM4 | 1.085              | 2QU3 | 1.279              | 2ZJM | 2.009              | 3KN0 | 2.445              | 3LPK | 2.569              |
| 2B8L | 0.792              | 2QZK | 1.398              | 2ZJN | 2.272              | 3KYR | 2.040              | 3MSJ | 1.714              |
| 2B8V | 1.621              | 2QZL | 2.039              | 3BRA | 2.157              | 3L38 | 1.052              | 3MSK | 1.688              |
| 2F3E | 1.368              | 2VA5 | 1.638              | 3BUF | 2.059              | 3L3A | 1.257              | 3MSL | 1.795              |
| 2F3F | 1.655              | 2VA6 | 1.664              | 3BUG | 2.223              | 3L58 | 2.763              | 3N4L | 1.077              |
| 2FDP | 1.692              | 2VA7 | 1.959              | 3BUH | 2.138              | 3L59 | 2.594              | 3NSH | 1.329              |
| 2G94 | 0.448              | 2VIE | 1.704              | 3CIB | 2.623              | 3L5B | 2.441              |      |                    |
| 2HIZ | 1.879              | 2VIJ | 1.691              | 3CIC | 2.621              | 3L5C | 2.419              |      |                    |
| 2HM1 | 1.916              | 2VIY | 1.992              | 3CID | 2.608              | 3L5D | 2.309              |      |                    |
| 2IQG | 1.912              | 2VIZ | 2.409              | 3CKP | 1.130              | 3L5E | 2.615              |      |                    |
| 2IRZ | 0.777              | 2VJ6 | 2.424              | 3CKR | 1.153              | 3L5F | 2.609              |      |                    |
| 2IS0 | 0.791              | 2VJ7 | 2.504              | 3DM6 | 1.567              | 3LHG | 1.163              |      |                    |
| 2NTR | 0.782              | 2VJ9 | 2.400              | 3DUY | 1.890              | 3LNK | 2.620              |      |                    |
| 2OAH | 0.919              | 2VKM | 0.523              | 3DV1 | 1.367              | 3LPI | 2.601              |      |                    |
| 2OF0 | 1.700              | 2VNM | 1.396              | 3DV5 | 1.409              | 3LPJ | 2.620              |      |                    |
| 2OHK | 1.662              | 2VNN | 1.392              | 3EXO | 2.026              | 3LPK | 2.569              |      |                    |
| 2OHL | 1.683              | 2WEZ | 1.999              | 3FKT | 1.310              | 3MSJ | 1.714              |      |                    |
| 2OHM | 1.631              | 2WF0 | 2.002              | 3H0B | 2.092              | 3MSK | 1.688              |      |                    |
| 2OHN | 1.664              | 2WF1 | 1.386              | 3HVG | 0.909              | 3MSL | 1.795              |      |                    |
| 2OHP | 1.718              | 2WF2 | 1.390              | 3HW1 | 1.943              | 3N4L | 1.077              |      |                    |
| 2OHQ | 1.674              | 2WF3 | 1.379              | 3I25 | 1.757              | 3NSH | 1.329              |      |                    |
| 2OHR | 1.781              | 2WF4 | 2.007              | 3IGB | 1.035              | 3KMX | 2.798              |      |                    |
| 2OHS | 2.014              | 2WJO | 1.705              | 3IN3 | 1.385              | 3KMY | 2.730              |      |                    |
| 2OHT | 1.678              | 2XFI | 2.007              | 3IN4 | 1.360              | 3KN0 | 2.445              |      |                    |
| 2OHU | 1.645              | 2XFJ | 1.656              | 3IND | 1.513              | 3KYR | 2.040              |      |                    |
| 2P4J | 0.508              | 2XFK | 2.287              | 3INE | 0.870              | 3L38 | 1.052              |      |                    |
| 2P83 | 1.872              | 2ZDZ | 1.407              | 3INF | 1.214              | 3L3A | 1.257              |      |                    |
| 2P8H | 0.797              | 2ZE1 | 0.728              | 3INH | 0.972              | 3L58 | 2.763              |      |                    |
| 2PH6 | 1.847              | 2ZHR | 0.466              | 3IVH | 2.031              | 3L59 | 2.594              |      |                    |

**Table S2.** PDB codes of the analysed X-Ray BACE-1 structures clustered according to their conformational behaviour

| Motion Description           | Reference Structure | Structures in the Cluster                                                                                                                                                                                                                                                                                                                                              |
|------------------------------|---------------------|------------------------------------------------------------------------------------------------------------------------------------------------------------------------------------------------------------------------------------------------------------------------------------------------------------------------------------------------------------------------|
| Flap open conformation       | 1XN3                | 1W50, 2OF0, 2OHK, 2OHL, 2OHM, 2OHN, 2OHP, 2OHQ, 2OHR, 2OHS, 2OHT, 2OHU, 2Q11, 2Q15, 2QU2, 2QU3, 2VA5, 2VA6, 2VA7, 2WJO, 2ZDZ, 2ZE1, 2ZHS, 2ZHT, 2ZHU, 2ZHV, 2ZJH, 2ZJI, 2ZJK, 2ZJL, 2ZJN, 2BRA, 3BUF, 3BUG, 3BUH, 3EXO, 3FKT, 3H0B, 3HW1, 3IGB, 3IN3, 3IN4, 3IND, 3INE, 3INF, 3KMY, 3KN0, 3L38, 3L3A, 3L59, 3L5B, 3L5C, 3L5D, 3L5E, 3L5F, 3LHG, 3LNK, 3MSJ, 3MSK, 3MSL |
| 10s loop closed conformation | 1FKN                | 1M4H, 1SGZ, 1XN2, 1XN3, 1XS7, 1YM2, 3F3F, 2G94, 2NTR, 2OAH, 2OHS, 2PH8, 2Q11, 2Q15, 2QK5, 2QMD, 2QMF, 2QMG, 2QP8, 2VA6, 2VA7, 2VIZ, 2VJ6, 2VJ9, 2XFK, 2ZE1, 2ZHR, 3CIB, 3CIC, 3CID, 3K5D, 3KMX, 3KMY, 3KN0, 3L58, 3L59, 3L5B, 3L5C, 3L5D, 3L5E, 3L5F, 3LNK, 3LPI, 3LPJ, 3LPK, 3MSJ, 3MSK, 3MSL, 3N4L, 3NSH                                                             |
| 10s loop open conformation   | 1W51                | 1W50, 1YM4, 2B8L, 2B8V, 2F3E, 2FDP, 2HIZ, 2HM1, 2IQG, 2IRZ, 2IS0, 2OF0, 2OHK, 2OHL, 2OHM, 2OHN, 2OHP, 2OHQ, 2OHR, 2OHT, 2OHU, 2P83, 2P8H, 2QU2, 2QU3, 2QZK, 2QZL, 2VA5, 2VIE, 2VIJ, 2VIY, 2VJ7, 2VNM, 2VNN, 2WEZ, 2WF0, 2WF1, 2WF2, 2WF3, 2WF4, 2WJO, 2XFI, 2XFJ, 2ZDZ, 2ZE1, 2ZHS, 2ZHT, 2ZHU, 2ZHV, 2ZJH, 2ZJI, 2ZJJ, 2ZJK, 2ZJL, 2ZJM, 2ZJN, 3BRA, 3BUF,            |

|                               |      |                                                                                                                                                                                                            |
|-------------------------------|------|------------------------------------------------------------------------------------------------------------------------------------------------------------------------------------------------------------|
|                               |      | 3BUG, 3BUH, 3CKP, 3CKR,<br>3DM6, 3DUY, 3DV1, 3DV5,<br>3EXO, 3FKT, 3H0B, 3HVG,<br>3HW1, 3I25, 3IGB, 3IN3, 3IN4,<br>3IND, 3INE, 3INF, 3INH, 3IVH,<br>3IVI, 3IXJ, 3IXK, 3K5C, 3K5F,<br>3K5G, 3KYR, 3L38, 3L3A |
| 10s loop outlier conformation | 1TQF | 2P4J, 2PH6, 2VKM,                                                                                                                                                                                          |

**Table S3.** Structures of the 45 known active inhibitors included in the docking simulations.

| Structure                                                                           | IC <sub>50</sub><br>( $\mu$ M) | Ref. | Structure                                                                            | IC <sub>50</sub><br>( $\mu$ M) | Ref. |
|-------------------------------------------------------------------------------------|--------------------------------|------|--------------------------------------------------------------------------------------|--------------------------------|------|
| 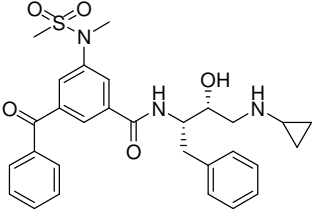   | 0.098                          | 2    |    | <1                             | 2    |
|    | 0.015                          | 2    |    | <1                             | 3    |
|   | 0.012                          | 4    |   | 11                             | 4    |
|  | 3.7                            | 6    |  | 16                             | 5    |
|  | 0.12                           | 6    |  | 2.2                            | 7    |
|  | 0.15                           | 6    |  | 4.3                            | 7    |

|                                                                                     |       |    |                                                                                      |        |    |
|-------------------------------------------------------------------------------------|-------|----|--------------------------------------------------------------------------------------|--------|----|
| 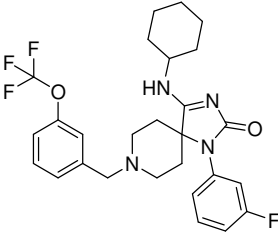   | <100  | 8  |    | 0.19   | 10 |
|    | 0.021 | 9  |    | 0.21   | 10 |
|    | 0.047 | 10 |    | 0.0018 | 11 |
|   | n.a.  | 10 |   | 0.1    | 11 |
|  | 0.012 | 10 |  | 0.0039 | 11 |
|  | 0.009 | 10 |  | 0.001  | 11 |
|  | 0.012 | 10 |  | 0.003  | 11 |

|                                                                                     |        |    |                                                                                      |      |    |
|-------------------------------------------------------------------------------------|--------|----|--------------------------------------------------------------------------------------|------|----|
| 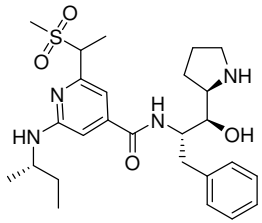   | 0.0039 | 11 |    | <10  | 12 |
|    | 0.82   | 11 |    | n.a. | 13 |
|    | 1.4    | 11 |    | n.a. | 14 |
|   | 5.2    | 11 |   | n.a. | 15 |
|  | 0.38   | 11 |  | n.a. | 15 |
|  | <100   | 16 |  | n.a. | 15 |
|  | n.a.   | 17 |  | n.a. | 15 |
|  | 32     | 18 |  | n.a. | 19 |

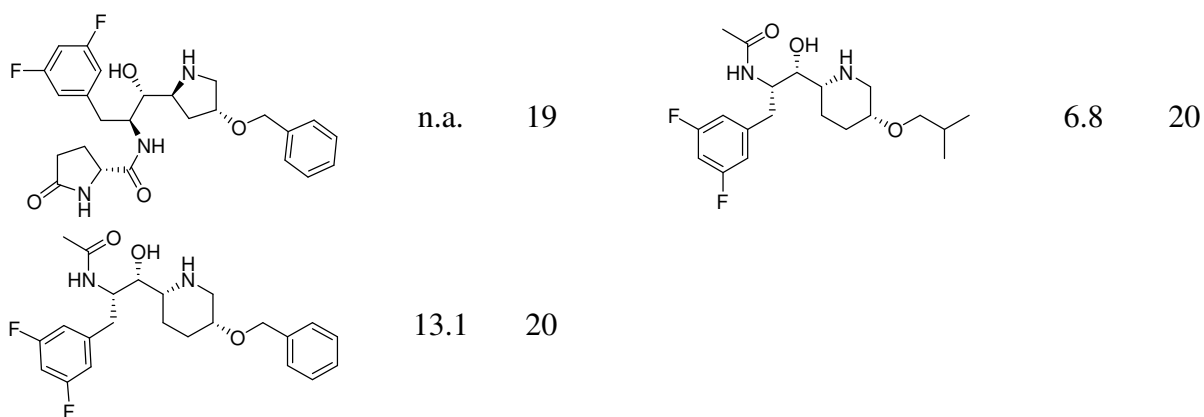

## Structure characterization of the active compounds

### General informations.

All the derivatives were purchased by National Cancer Institute (NCI) and used as received.  $^1\text{H}$  NMR spectra were recorded with a Varian 400 spectrometer, operating at 400 MHz. Chemical shifts are reported in  $\delta$  values (ppm) relative to internal  $\text{Me}_4\text{Si}$ , and  $J$  values are reported in hertz (Hz). Direct infusion ESI-MS spectra were recorded on Waters ZQ 4000 apparatus.

**290956**; 8-[3-(2-chloro-10H-phenothiazin-10-yl)propyl]-1-thia-4,8-diazaspiro[4.5]decan-3-one;  $^1\text{H}$  NMR ( $\text{DMSO-}d_6$ )  $\delta$  10.39 (bs, 1 H), 7.26-6.95 (m, 7H), 3.93 (t,  $J = 7.01$  Hz, 2H), 3.52 (s, 2H), 3.21-2.85 (m, 6H), 2.32-2.15 (m, 4H), 2.13-1.92 (m, 2H). MS found  $(\text{M} + \text{H})^+$  ( $m/z$ ): 446. Calcd for  $\text{C}_{22}\text{H}_{24}\text{ClN}_3\text{OS}_2$   $m/z$ : 445.10.

**299209** 4-[(quinolin-3-ylmethyl)amino]benzenesulfonamide  $^1\text{H}$  NMR ( $\text{DMSO-}d_6$ )  $\delta$  8.89 (s, 1H), 8.21 (s, 1H), 7.98 (d,  $J = 8.29$  Hz, 1H), 7.92 (d,  $J = 7.96$  Hz, 1H), 7.70 (t,  $J = 7.33$  Hz, 1H), 7.56 (t,  $J = 7.55$  Hz, 1H), 7.47 (d,  $J = 8.42$  Hz, 2H), 7.11 (bs, 1H), 7.87 (bs, 2H), 6.68 (d,  $J = 8.46$  Hz, 2H), 4.55 (d,  $J = 5.61$  Hz, 2H). MS found  $(\text{M} + \text{Na})^+$  ( $m/z$ ): 336. Calcd for  $\text{C}_{16}\text{H}_{15}\text{N}_3\text{O}_2\text{S}$   $m/z$ : 313.09.

**263220**; 3-benzyl-6-chloro-3,4-dihydro-2H-1,2,4-benzothiadiazine-7-sulfonamide 1,1-dioxide;  $^1\text{H}$  NMR ( $\text{DMSO-}d_6$ )  $\delta$  8.11 (s, 1H), 7.95 (s, 1H), 7.34-7.28 (m, 4H), 7.27-7.23 (m, 1H), 7.01 (s, 1H), 4.98-4.92 (m, 1H), 3.16-3.08 (m, 1H), 3.02-2.93 (m, 1H). MS found  $(\text{M} + \text{Na})^+$  ( $m/z$ ): 410. Calcd for  $\text{C}_{14}\text{H}_{14}\text{ClN}_3\text{O}_2\text{S}$   $m/z$ : 387.01.

**372280**; 2-[5-(phenoxyethyl)-1H-indol-3-yl]2,4-dihydrofuro[2,3,b]quinoxalin-3-ol;  $^1\text{H}$  NMR ( $\text{DMSO-}d_6$ )  $\delta$  12.01 (bs, 1H), 9.86 (s, 1H), 8.20 (s, 1H), 7.68-7.64 (m, 1H), 7.50-7.27 (m, 10H), 6.98-6.92 (m, 1H), 5.10 (m, 3H).

**116490**; 12-[(4-methylpiperidin-1-yl)acetyl]-12H-benzo[*b*]phenothiazine;  $^1\text{H}$  NMR ( $\text{DMSO-}d_6$ )  $\delta$  8.20 (s, 1H), 8.10 (s, 1H), 7.95-7.86 (m, 2H), 7.66 (d,  $J = 8.27$  Hz, 1H), 7.59-7.48 (m, 3H), 7.37 (t,  $J = 7.35$  Hz, 1H), 7.28 (t,  $J = 7.14$  Hz, 1H), 2.35 (m, 1H), 1.82 (m, 4H), 1.35 (m, 4H), 0.73 (d,  $J = 6.7$  Hz, 3H), 0.87-0.54 (m, 5H). MS found  $(\text{M} + \text{Na})^+$  ( $m/z$ ): 389. Calcd for  $\text{C}_{24}\text{H}_{24}\text{N}_2\text{OS}$   $m/z$ : 388.16.



**162404;** 3-methyl-2-oxo-2*H*-chromen-7-yl 4-[[amino(imino)methyl]amino]benzoate; <sup>1</sup>H NMR (DMSO-*d*<sub>6</sub>) δ 8.16 (d, *J* = 8.77 Hz, 2H), 7.89-7.80 (m, 4H), 7.46-7.40 (m, 2H), 7.36-7.31 (m, 1H), 6.41(s, 1H), 2.45 (s, 3H). MS found (M + H)<sup>+</sup> (*m/z*): 338. Calcd for C<sub>18</sub>H<sub>15</sub>N<sub>3</sub>O<sub>4</sub> *m/z*: 337.11

**59349;** 8-[3-(2-chloro-10*H*-phenothiazin-10-yl)propyl]-8-azabicyclo[3.2.1]octan-3-ol; <sup>1</sup>H NMR (DMSO-*d*<sub>6</sub>) δ 7.29-6.94 (m, 7H), 3.98-3.79 (m, 5H), 3.04-2.91 (m, 2H), 2.11-1.59(m, 10H). MS found (M + H)<sup>+</sup> (*m/z*): 401. Calcd for C<sub>22</sub>H<sub>25</sub>ClN<sub>2</sub>OS *m/z*: 400.14

**126710;** 5-(3,4-dichlorophenyl)-6-[(3-methyl-4-nitrophenoxy)methyl]pyrimidine-2,4-diamine; <sup>1</sup>H NMR (DMSO-*d*<sub>6</sub>) δ 7.96 (d, *J* = 10.13 Hz, 1H), 7.57 (d, *J* = 8.07 Hz, 1H), 7.40 (s, 1H), 7.16 (d, *J* = 8.22 Hz, 1H), 6.80 (s, 2H), 6.15 (s, 2H), 6.02 (bs, 4H), 4.63 (s, 3H). MS found (M + H)<sup>+</sup> (*m/z*): 420. Calcd for C<sub>18</sub>H<sub>15</sub>Cl<sub>2</sub>N<sub>5</sub>O<sub>3</sub> *m/z*: 419.06

**13316;** [2-(4-chlorophenyl)quinolin-4-yl](piperidin-2-yl)methanol; <sup>1</sup>H NMR (DMSO-*d*<sub>6</sub>) δ 8.28-8.19 (m, 3H), 8.12 (s, 1H), 8.07 (d, *J* = 8.54 Hz, 1H), 7.75 (t, *J* = 7.47 Hz, 1H), 7.63-7.56 (m, 3H), 5.66 (bs, 1H), 5.26-5.21 (m, 1H), 2.92-2.78(m, 2H), 2.40 (t, *J* = 11.90 Hz, 1H), 1.71-1.63 (m, 1H), 1.52-1.36 (m, 2H), 1.28-1.06 (m, 3H). MS found (M + H)<sup>+</sup> (*m/z*): 353. Calcd for C<sub>21</sub>H<sub>21</sub>ClN<sub>2</sub>O *m/z*: 352.13

**150117;** (2*Z*)-2-benzylidene-3-(cyclohexylamino)indan-1-one; <sup>1</sup>H NMR (DMSO-*d*<sub>6</sub>) δ 8.14-8.09 (m, 1H), 8.04-7.97 (m, 1H), 7.94-7.80 (m, 4H), 7.77-7.67 (m, 1H), 7.56-7.45 (m, 3H), 2.68 (m, 1H), 1.89 (m, 4H), 1.61-0.86 (m, 6H). MS found (M + H)<sup>+</sup> (*m/z*): 318. Calcd for C<sub>22</sub>H<sub>23</sub>NO *m/z*: 317.18

**19976;** 10-[3-(1-azaspiro[4.5]dec-1-yl)propyl]-2-chloro-10*H*-phenothiazine; <sup>1</sup>H NMR (DMSO-*d*<sub>6</sub>) δ 7.21-6.99 (m, 5H), 6.97-6.88 (m, 2H), 3.89 (t, *J* = 6.7 Hz, 2H), 2.68 (m, 2H), 1.75-1.40 (m, 12H), 1.27-0.83 (m, 6H). MS found (M + H)<sup>+</sup> (*m/z*): 413. Calcd for C<sub>24</sub>H<sub>29</sub>ClN<sub>2</sub>S *m/z*: 412.17

**309874;** 3-chloro-N-{2-[(2-methyl-1,2,3,4-tetrahydroisoquinolin-1-yl)methyl]phenyl}-1-benzothiophene-2-carboxamide; <sup>1</sup>H NMR (DMSO-*d*<sub>6</sub>) δ 8.17-8.11 (m, 1H), 7.98-7.90 (m, 1H), 7.68-7.57 (m, 3H), 7.20-6.88 (m, 7H), 3.81 (m, 1H), 3.18-2.92 (m, 2H), 2.67-2.25 (m, 4H), 2.15 (s, 3H). MS found (M + H)<sup>+</sup> (*m/z*): 447. Calcd for C<sub>26</sub>H<sub>23</sub>ClN<sub>2</sub>OS *m/z*: 446.12

**88852;** 1-[[[(3,5-dibromo-2-hydroxybenzyl)(methyl)amino]methyl]-2-naphthol; <sup>1</sup>H NMR (DMSO-*d*<sub>6</sub>) δ 7.99 (d, *J* = 8.72 Hz, 1H), 7.82-7.72 (m, 2H), 7.54-7.45 (m, 2H), 7.33-7.17 (m, 3H), 4.08 (s, 2H), 3.82 (s, 2H), 2.17 (s, 3H). MS found (M + H)<sup>+</sup> (*m/z*): 452. Calcd for C<sub>19</sub>H<sub>17</sub>Br<sub>2</sub>NO<sub>2</sub> *m/z*: 450.96

**170561;** 1-methyl-2-[(4-methylpiperazin-1-yl)methyl]indeno[1,2,3-*de*]quinazolin-1-ium; <sup>1</sup>H NMR (DMSO-*d*<sub>6</sub>) δ 8.29 (d, *J* = 7.68 Hz, 1H), 8.08 (t, *J* = 6.95 Hz, 2H), 7.86-7.74 (m, 2H), 7.60 (t, *J* = 7.39 Hz, 1H), 7.50 (t, *J* = 7.56 Hz, 1H), 4.03 (s, 2H), 2.76-2.61 (m, 4H), 2.39-2.25 (m, 4H), 2.13 (s, 3H). MS found (M + H)<sup>+</sup> (*m/z*): 333. Calcd for C<sub>20</sub>H<sub>20</sub>N<sub>4</sub>O *m/z*: 332.16

**62914;** 2,6-Bis(2-hydroxy-3-*tert*-butyl-5-methylbenzyl)-4-methylphenol; <sup>1</sup>H NMR (DMSO-*d*<sub>6</sub>) δ 6.79 (s, 2H), 6.70 (s, 2H), 6.56 (s, 2H), 3.79 (s, 4H), 2.07 (s, 9H), 1.32 (s, 18H). MS found (M + Na)<sup>+</sup> (*m/z*): 483. Calcd for C<sub>31</sub>H<sub>40</sub>O<sub>3</sub> *m/z*: 460.30.

**79563**; 1,3-bis(4-chlorobenzyl)-2-(5,8-dihydrophenanthren-9-yl)hexahydropyrimidine; <sup>1</sup>H NMR (DMSO-*d*<sub>6</sub>) δ 8.04-7.90 (m, 2H), 7.78-7.58 (m, 5H), 7.23-7.12 (m, 5H), 7.06-6.94 (5H), 4.08 (s, 1H), 3.34 (s, 4H), 2.11-2.04 (m, 4H), 1.54 (m, 2H). MS found (M + H)<sup>+</sup> (*m/z*): 513. Calcd for C<sub>32</sub>H<sub>30</sub>Cl<sub>2</sub>N<sub>2</sub> *m/z*: 512.18

## References.

1. The table reports all the structures up to December 2010.
2. Stachel, S. J.; Coburn, C. A.; Steele, T. G.; Crouthamel, M. C.; Pietrak, B. L.; Lai, M. T.; Holloway, M. K.; Munshi, S.K.; Graham, S. L.; Vacca, J. P. Conformationally biased P3 amide replacements of beta-secretase inhibitors. *Bioorg. Med. Chem. Lett.* **2006**, *16*, 641–644.
3. Zhu, Z.; McKittrick, B.; Sun, Z.-Y.; Ye, Y.C.; Voigt, J.H.; Strickland, C.; Smith, E.M.; Stamford, A.; Greenlee, W.J.; Wu, Y.; Iserloh, U.; Mazzola, R.; Caldwell, J.; Cumming, J.; Wang, L.; Guo, T.; Le, T.X.H.; Saionz, K.W.; Babu, S.D.; Hunter, R.C. Patent WO2005058311, **2005**.
4. Rajapakse, H. A.; Nantermet, P. G.; Selnick, H. G.; Munshi, S.; McGaughey, G. B.; Lindsley, S. R.; Young, M. B.; Lai, M.-T.; Espeseth, A. S.; Shi, X.-P.; Colussi, D.; Pietrak, B.; Crouthamel, M.-C.; Tugusheva, K.; Huang, Q.; Xu, M.; Simon, A. J.; Kuo, L.; Hazuda, D. J.; Graham, S.; Vacca, J. P. Discovery of Oxadiazoyl Tertiary Carbinamine Inhibitors of β-Secretase (BACE-1). *J. Med. Chem.* **2006**, *49*, 7270–7273.
5. Godel, T.; Hilpert, H.; Humm, R.; Rogers-Evans, M.; Rombach, D.; Stahl, Christoph M.; Weiss, P.; Wostl, W.. Preparation of tetronic and tetramic acids as beta-secretase inhibitors. U.S. Pat. Appl. Pub. US2005119329, **2005**.
6. Cole, D. C.; Manas, E. S.; Stock, J. R.; Condon, J. S.; Jennings, L. D.; Aulabaugh, A.; Chopra, R.; Cowling, R.; Ellingboe, J. W.; Fan, K. Y.; Harrison, B. L.; Hu, Y.; Jacobsen, S.; Jin, G.; Lin, L.; Lovering, F. E.; Malamas, M. S.; Stahl, M. L.; Strand, J.; Sukhdeo, M. N.; Svenson, K.; Turner, M. J.; Wagner, E.; Wu, J.; Zhou, P.; Bard, J. Acylguanidines as Small-Molecule β-Secretase Inhibitors. *J. Med. Chem.* **2006**, *49*, 6158–6161.
7. Watanabe, H.; Kurasawa, O.; Tarui, N.; Yorimoto, T.; Hirai, K. Preparation of indoles as inhibitors against aspartate protease, β-secretase, and amyloid b protein for treatment of nerve disorders and myopathy. Patent JP2004149429, **2004**.
8. Barrow, J. C.; Coburn, C. A.; Egbertson, M. S.; McGaughey, G. B.; McWherter, M. A.; Neilson, L. A.; Selnick, H. G.; Stauffer, S. R.; Yang, Z. Q.; Yang, W.; Lu, W.; Fahr, B.; Rittle, K. E. Preparation of spiropiperidine compounds as β-secretase inhibitors for the treatment of Alzheimer's disease. Patent WO2006044497, **2006**.
9. Baxter, E.; Boyd, R.; Coats, S.; Jordan, A.; Reitz, A.; R., C. H.; Scott, M.; Schulz, M.; De Winter, H. L. J. Novel 2-aminoquinazoline derivatives, their preparation and use as inhibitors of β-secretase for treating Alzheimer's disease and related disorders. Patent WO2006017844, **2006**.
10. Maillard, M.; Baldwin, E. T.; Beck, J. T.; Hughes, R.; John, V., J.; Pulley, S. R.; Tenbrink, R. Preparation of ring-containing N-acetyl 2-hydroxy-1,3-diaminoalkanes as β-secretase inhibitors for treating Alzheimer's disease and other diseases characterized by deposition of Aβ-peptide. Patent WO2004024081, **2004**.
11. Dally, R.D.; Shepherd, T.A.; Bender, D.M.; Rojo Garcia, M.I. Pyrrolidine derivatives useful as BACE inhibitors. Patent WO2005108358, **2005**.

12. Demont, E. H.; Redshaw, S.; Walter, D. S. Preparation of N,N'-substituted-1,3-diamino-2-oxopropane derivatives as Asp2 inhibitors for use against diseases characterized by elevated  $\beta$ -amyloid levels or  $\beta$ -amyloid deposits, particularly Alzheimer's disease. Patent WO2005113525, **2005**.
13. Sealy, J.; Hom, R.; John, V.; Probst, G.; Tung, J. S. Preparation of oxime-containing N-(3-amino-1-arylmethyl-2-hydroxypropyl) carboxamide and related selective  $\beta$ -secretase inhibitors for treating amyloidosis. Patent WO2006010094, **2006**.
14. Redshaw, S.; Demont, E. H.; Walter, D. S. Preparation of tricyclic indole hydroxyethylamine derivatives and their use in the treatment of Alzheimer's disease. Patent WO2005058915, 2005.
15. John, V.; Maillard, M.; Tucker, J.; Aquino, J.; Hom, R.; Tung, J.; Dressen, D.; Shah, N.; Neitz, R. J. Preparation of substituted urea and carbamate, phenacyl-2-hydroxy-3-diaminoalkane, and benzamide-2-hydroxy-3-diaminoalkane aspartyl protease and  $\beta$ -secretase inhibitors for treating conditions associated with amyloidosis such as Alzheimer's disease. Patent WO2005087215, **2005**.
16. Coburn, C. A.; Espeseth, A. S.; Stachel, S. J.; Olsen, D. B.; Hazuda, D. J.; Holloway, M. K.. Preparation of 2-aminothiazole compounds as aspartyl protease inhibitors. Patent WO2005097767, 2005.
17. Willems, H. Preparation of substituted 1,3,5-triazine derivatives as anti-Alzheimer's agents. Brit. UK Pat. Appl. GB2397301, **2004**.
18. Harris, W.; John, D. E.; Firth-Clark, S. Preparation of pyrazolytetraazafluorenes for treatment or prevention of Alzheimer's disease. Patent WO2004096808, **2004**.
19. (a) Cumming, J. N.; Iserloh, U.; Stamford, A.; Strickland, C.; Voigt, J. H.; Wu, Y.; Huang, Y.; Xia, Y.; Chackalamannil, S.; Guo, T.; Hobbs, D. W.; Le, T. X. H.; Lowrie, J. F.; Saionz, K. W.; Babu, S. D. Preparation of aminohydroxyalkyl cyclic amine BACE -1 inhibitors having a benzamide substituent. Patent WO2005016876, **2005**. (b) Cumming, J. N.; Huang, Y.; Li, G.; Iserloh, U.; Stamford, A.; Strickland, C.; Voigt, J. H.; Wu, Y.; Pan, J.; Guo, T.; Hobbs, D. W.; Le, T. X. H.; Lowrie, J. F. Preparation of cyclic amine BACE-1 inhibitors having a heterocyclic substituent. Patent WO2005014540, **2005**.
20. Bueno Melendo, A. B.; Chen, S. H.; Erickson, J. A.; Gonzalez-Garcia, M. R.; Guo, D.; Marcos Llorente, A.; McCarthy, J. R.; Shepherd, T. A.; Sheehan, S. M.; Yip, Y. Y. M. Preparation of amides as BACE inhibitors for treating Alzheimer's. Patent WO2005108391, **2005**.
